# Supplementary material
Source: HighWire-hosted journal article supplement (https://cmajopen.ca/highwire/filestream/89603/field_highwire_adjunct_files/0/open-2022-0045-1-at.pdf)
Supplement: open-2022-0045-1-at.pdf [file open-2022-0045-1-at.pdf]

**Supplementary Table 1: Assays and their Specifications by Province for each time period**

| Province | Laboratory site                                                                                                                                         | Time Period/s | Assay                                                    | Description of assay (IgG, IgA, IgM) | Specifications |
|----------|---------------------------------------------------------------------------------------------------------------------------------------------------------|---------------|----------------------------------------------------------|--------------------------------------|----------------|
| BC       | BC Centres for Disease Control Public Health Laboratory (BCCDC)                                                                                         | A, B, C, D    | OrthoDiagnostics VITROS Anti-SARS-CoV-2 Total            | IgG, IgA, IgM                        | Anti-S         |
|          |                                                                                                                                                         | D             | Abbott Architect SARS-CoV-2 IgG                          | IgG                                  | Anti-N         |
|          |                                                                                                                                                         | Omicron*      | MesoScale Discovery V-Plex- SARS-CoV-2 Panel 2           | IgG                                  | Anti-N         |
| SK       | The Roy Romanow Provincial Laboratory (RRPL)                                                                                                            |               | OrthoDiagnostics VITROS Anti-SARS-CoV-2 Total            | IgG, IgA, IgM                        | Anti-S         |
| AB       | Alberta Health Services - Public Health Laboratory (ProvLab)<br>Calgary site: Foothills Medical Centre<br>Edmonton site: University of Alberta Hospital | A, B, C, D    | Abbott Architect SARS-CoV-2 IgG                          | IgG                                  | Anti-N         |
|          |                                                                                                                                                         | D             | DiaSorin LIAISON SARS-CoV-2 TrimericS IgG                | IgG                                  | Anti-S         |
| MB**     | Cadhams Provincial Laboratory                                                                                                                           | A, B, C, D    | DiaSorin LIAISON SARS-CoV-2 S1/S2 IgG                    | IgG                                  | Anti-S         |
|          |                                                                                                                                                         | D             | Abbott Architect SARS-CoV-2 IgG                          | IgG                                  | Anti-N         |
| ON       | Public Health Ontario (PHO) Provincial Laboratory                                                                                                       |               | OrthoDiagnostics VITROS Anti-SARS-CoV-2 Total            | IgG, IgA, IgM                        | Anti-S         |
| QC       | Le Centre hospitalier universitaire Sainte-Justine (CHU-Ste. Jus)                                                                                       |               | DiaSorin LIAISON SARS-CoV-2 TrimericS IgG                | IgG                                  | Anti-S         |
| NL       | Newfoundland and Labrador Public Health Laboratory                                                                                                      | A, B, C, D    | EUROIMMUN                                                | IgG                                  | Anti-S         |
|          |                                                                                                                                                         | D             | Abbott Architect SARS-CoV-2 IgG                          | IgG                                  | Anti-N         |
| NS       | Izaak Walton Killam Health Centre (IWK Health)                                                                                                          |               | OrthoDiagnostics VITROS Anti-SARS-CoV-2 Total            | IgG, IgA, IgM                        | Anti-S         |
| PEI      | Health PEI                                                                                                                                              | A, B, C, D    | Roche Diagnostics Elecsys Anti-SARS-CoV-2 Total Antibody | IgG, IgA, IgM                        | Anti-N         |
|          |                                                                                                                                                         | D             | Roche Anti-S                                             | IgG                                  | Anti-S         |
| NB       | Vitalite Health Network Laboratory                                                                                                                      |               | OrthoDiagnostics VITROS Anti-SARS-CoV-2 Total            | IgG, IgA, IgM                        | Anti-S         |

Anti-N = Anti-nucleocapsid assay Anti- S = Anti-spike assay. \*This is the longitudinal analysis from November 15 2021 to June 11 2022.

\*\*Period D results not available for MB at the time of publication.
